# Supplementary material for: Co-Expression of Lipid Transporters Simultaneously Enhances Oil and Starch Accumulation in the Green Microalga Chlamydomonas reinhardtii under Nitrogen Starvation
Source: MDPI journal article supplement (doi:10.3390/metabo13010115), 2023-01-10
Supplement: s1 [file s1]

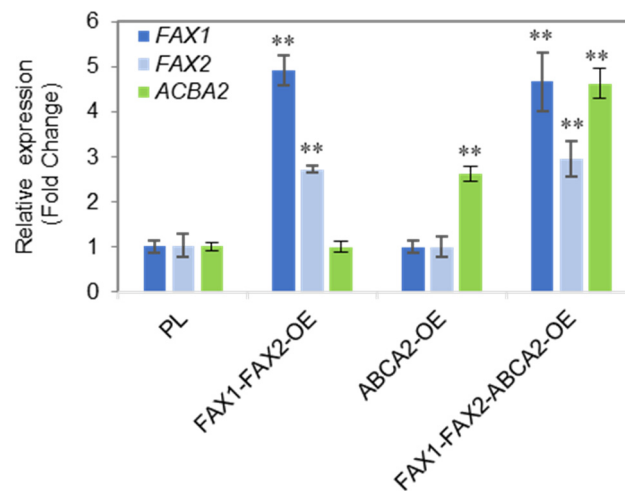

**Figure S1.** Quantitative RT-PCR analysis (RT-qPCR) analysis of the expression of *FAX1*, *FAX2*, and *ABCA2* in the transformants under N starvation for 48 h. PL, parental line (UVM4). Error bars represent standard errors based on four biological replicates. Asterisks indicate statistically significant changes compared PL by paired-sample Student's t test (\*\* $P \leq 0.01$ ).

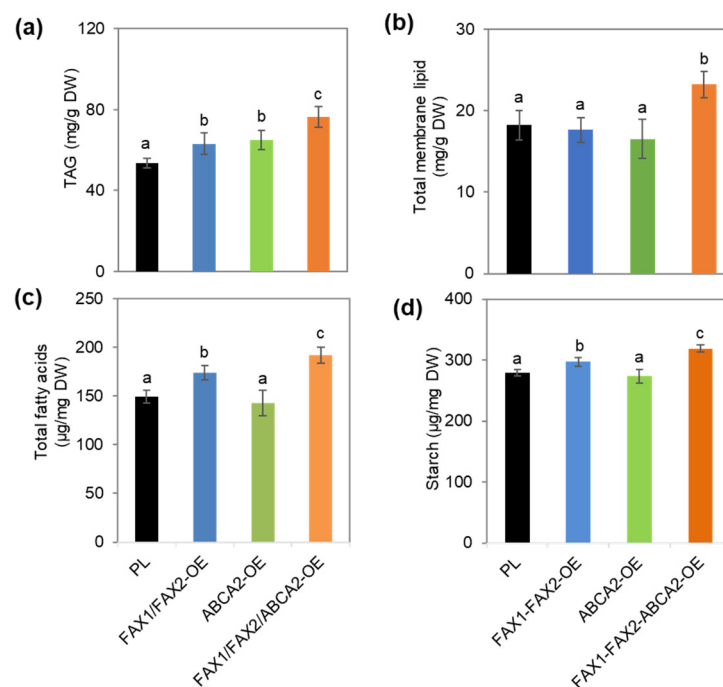

**Figure S2.** The contents of TAG, total membrane lipid, total fatty acids and starch under N starvation for 48 h in the transformants analyzed based on dry weight biomass (DW). (a) TAG contents. (b) Total membrane lipid contents. (c) Total fatty acids. (d) Starch contents. Error bars represent standard errors based on four biological replicates. The distinct letters labelled indicate the statistically significant difference by Tukey's HSD test.

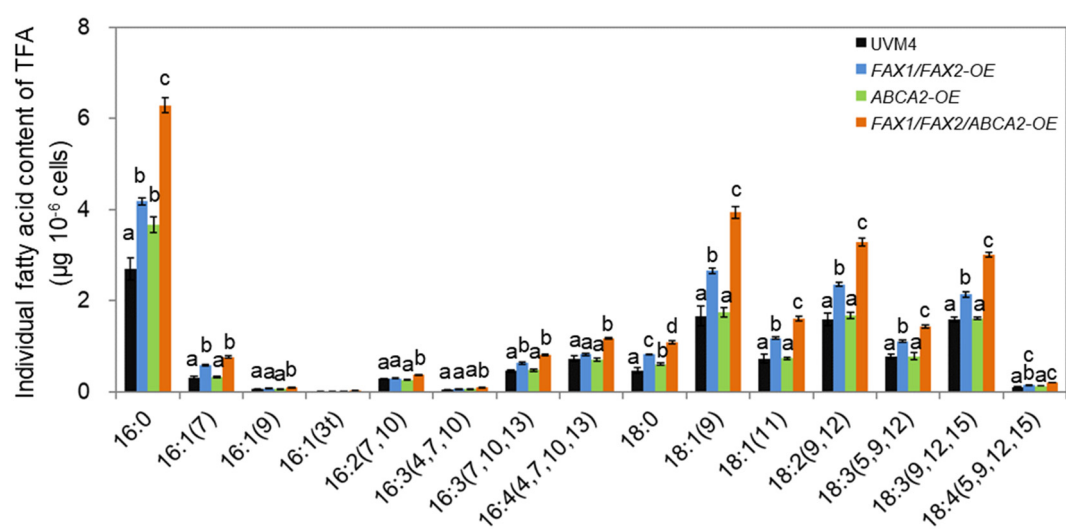

**Figure S3.** The profile of individual fatty acid content of total fatty acids (TFA) under N starvation for 48 h in the transformants were analyzed. Error bars represent standard errors based on three biological replicates. Data are based on Chen et al. (2022). The distinct letters labelled indicate the statistically significant difference by Tukey's HSD test.

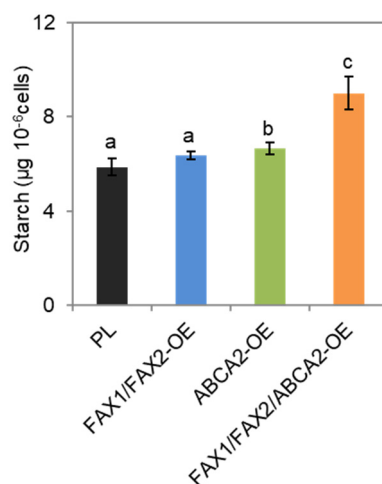

**Figure S4.** The starch content under normal culture condition (before nitrogen starvation). Error bars represent standard errors based on three biological replicates with three technical replicates each. The distinct letters labelled indicate the statistically significant difference by Tukey's HSD test.

**Table S1.** All primer sequences used for RT-qPCR in this study.

| Target gene | Primer name | Sequence (5'-3')         |
|-------------|-------------|--------------------------|
| RACK1       | RACK1-F1    | CTTCTCGCCCATGACCAC       |
|             | RACK1-R1    | CCCACCAGGTTGTTCTTCAG     |
| PDAT1       | PDAT1-F     | CTGCCTCGCCTCAATGCCTACC   |
|             | PDAT1-R     | CAGCAGGCCCGTTATAGGCGCTG  |
| DGAT1       | DGAT1-F     | GCTCAACGTGCTAGCAGAGCTGA  |
|             | DGAT1-R     | CCGTATGGCTGGGAAGTAGACGT  |
| PGD1        | PGD1-F      | AGCCAGCTATTGTGCGCACTT    |
|             | PGD1-R      | CAAGAAATCCGCTGACATCCGT   |
| ABCA2       | ABCA2-qF1   | CGTCGCTCAAGGAGTTTGCGCA   |
|             | ABCA2-qR    | TTGAGCCCCAGCTCCTTCTCCG   |
| FAX1        | FAX1-qF     | TTCCCTGCTGCAACGATCCCT    |
|             | FAX1-qR     | GGCTGGCCCTAGATGTGGATGT   |
| FAX2        | FAX2-qF     | GTCTTCTGGCCCTAGCGGGT     |
|             | FAX2-R-qPCR | CGGCTTGACAGACGGCTTTATGCT |
| DGTT1       | CrDGTT1-F   | CGGGCTCTAAAGATGACGCCAACT |
|             | CrDGTT1-R   | CGTGCGGGTGGCTCACGAATATAT |
| DGTT2       | CrDGTT2-F   | CGCACACCATGTAAATGTTGCGGC |
|             | CrDGTT2-R   | TTTGCAACTCTCAGGTGCTGGAC  |
| DGTT3       | CrDGTT3-F   | CTGAAGAAGGGCAGTGTGGCGGT  |
|             | CrDGTT3-R   | CCAGCACTTGGCTCTGACCGAAGT |
| DGTT4       | CrDGTT4-F   | GTCAGCGCCATCTACACCTCGGT  |
|             | CrDGTT4-R   | AACTGAAGTGCACGAACCGCTC   |
| DGTT5       | CrDGTT5-F   | GCTGAAAGGCCCCGAAGGACGAT  |
|             | CrDGTT5-R   | AGGATCTTGCTGTTGCCCATGTGG |
| DGAT1       | qDGAT-F     | GCTCAACGTGCTAGCAGAGCTGA  |
|             | qDGAT-R     | CCGTATGGCTGGGAAGTAGACGT  |
| LACS1       | qLACS1-F    | CGTCGGATACTGGCAGGGTG     |
|             | qLACS1-R    | ATAAGCCGGGACAGGAAGC      |
| GPAT        | qGPAT-F     | ATCAGCGGTTGTCGAAAACGTCG  |
|             | qGPAT-R     | GATGTTCCAGTTCCAGGGCTCCG  |
| ACC1        | ACC1-F      | CCAGCGTCTGCAAGTCGCTC     |
|             | ACC1-R      | GCTGCCGATACCGCACACGAT    |
| KAS1        | KAS1-F      | TGGAGAAGGAGCGCTGCTCC     |
|             | KAS1-R      | CCCTTCTGGACCAGGTTGGACA   |
| LPAT1       | CrLPAAT1-F  | ACAGGCCACGTGATGATAAACCGT |
|             | CrLPAAT1-R  | ATCTTGCACTCCAGGCTGCGAGT  |
| FAD2        | FAD2-F      | TCCTACATGCCGCACTATCA     |
|             | FAD2-R      | TGGTACCAGTACACCTGCTC     |
| FAD3        | FAD3-F      | TGTTTCGAGTCCTACCACCTGCG  |
|             | FAD3-R      | CACGGATGGCGTTGTACAGCTC   |
| FAD6        | FAD6-F      | TCTATCAGCCCCTGGTACCTGC   |
|             | FAD6-R      | GATGTGGCCCAATGTCCTCG     |
| FAD7        | FAD7-F      | AAGCTGTACGACCACCTGGAGC   |
|             | FAD7-R      | GTCGTAGTGCGAGCCCTCCTT    |
| STA1        | STA1-F      | CCCAGTTCAACTCGACCTCCCTGA |
|             | STA1-R      | CCCTGGAACCACTCCTTGTCGGT  |
| STA6        | STA6-F      | ACATCAGCAAGACGGTGCTGGG   |
|             | STA6-R      | CCGAGTTGAACTGGGTGAGGCAG  |
